# Supplementary material for: Evaluation of Smallpox Vaccination Coverage and Attitude towards Monkeypox Vaccination among Healthcare Workers in An Italian University Hospital
Source: Preprints.org preprint supplement (doi:10.20944/preprints202309.0154.v1), 2023-09-05
Supplement: Supplementary file 1 [file supplementary]

**Table S1.** Year of birth and department of HCWS who did not complete the self-declaration.

|  | **Born since 1979** | **Born before 1979** | ***p*** |
| --- | --- | --- | --- |
| Department  Infectious diseases  Emergency medicine  Virology  Proctological surgery | 2 (22.2%)  69 (59.5%)  0 (0%)  2 (50%) | 7 (77.8%)  47 (40.5%)  5 (100%)  2 (50%) | 0.012 |
| Infectious diseases  Not infectious diseases | 2 (22.2%)  71 (56.8%) | 7 (77.8%)  54 (43.2%) | 0.044 |
| Emergency medicine  Not emergency medicine | 69 (59.5%)  4 (22.2%) | 47 (40.5%)  14 (77.8%) | 0.003 |
| Virology  Not virology | 0 (0%)  73 (56.6%) | 5 (100%)  56 (43.4%) | 0.013 |
| Proctological surgery  Not Proctological surgery | 2 (50%)  71 (54.6%) | 2 (50%)  59 (45.4%) | 0.855 |


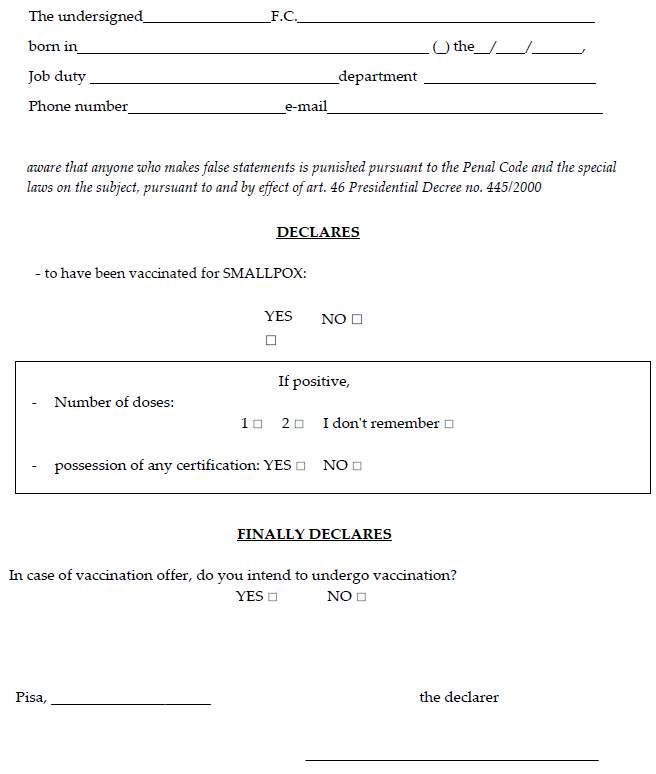


**Figure S1.** Self-declaration.
